# Supplementary material for: A single-cell atlas of de novo β-cell regeneration reveals the contribution of hybrid β/δ-cells to diabetes recovery in zebrafish
Source: Oxford University Press journal article supplement (doi:10.1242/dev.199853), 2022-01-15
Supplement: dev199853supp.pdf [file dev199853supp.pdf]

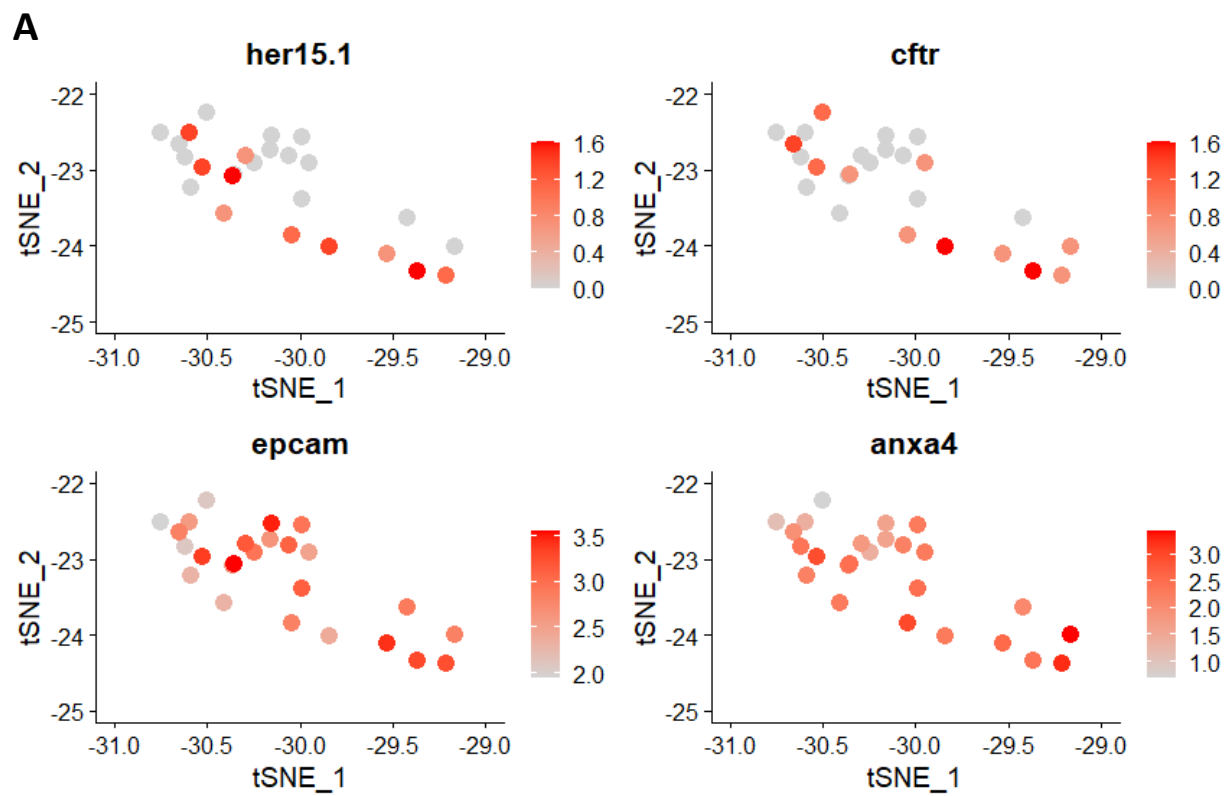

**Fig. S1. Markers for duct cells (A).** t-SNE plot representation of duct cell population expressing *her15.1*, *cftr*, *epcam* and *anxa4*

**A**

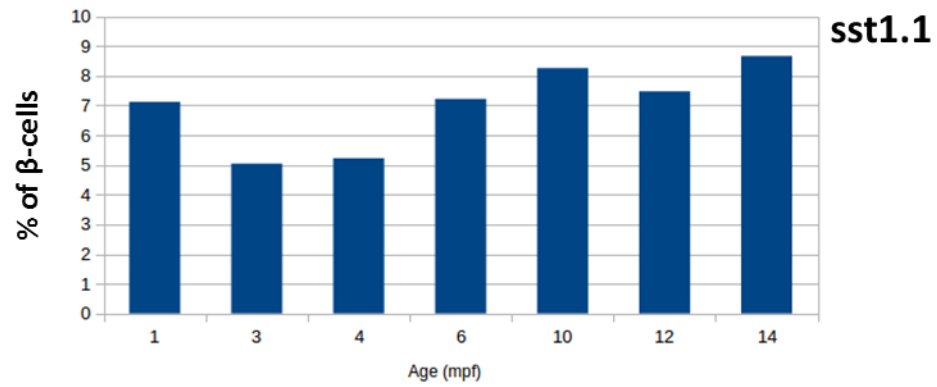

**B**

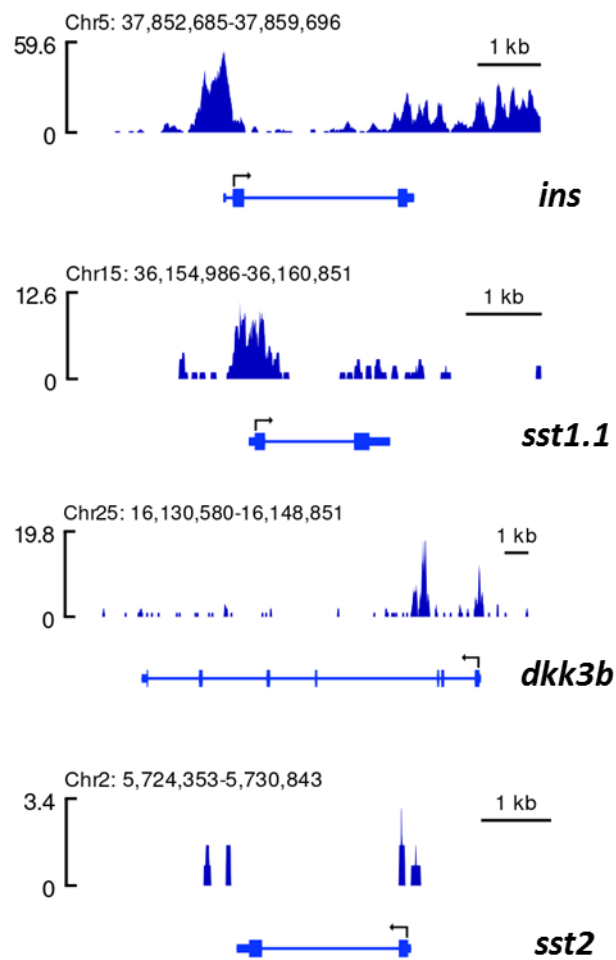

**Fig. S2. Persistence of bi-hormonal cells during various developmental stages of zebrafish and ATAC seq analysis of chromatin in  $\beta$ -cells.** **(A)** Boxplot depicting the percentage of  $\beta$ -cells expressing *sst1.1* in a previously published single-cell smartseq2 RNA-Seq. dataset. The dataset contains single-cell RNA-Seq. profiles of  $\beta$ -cells isolated from the *Tg(ins:BB1.0L)* transgenic line using FACS at different stages of the zebrafish juvenile and adult life. **(B)** Plots for selected genes depicting the open genomic regions (in orange) identified using ATAC-Seq. specifically for  $\beta$ -cells. Regions proximal to the promoters of *ins*, *sst1.1* and *dkk3b* genes display open chromatin.

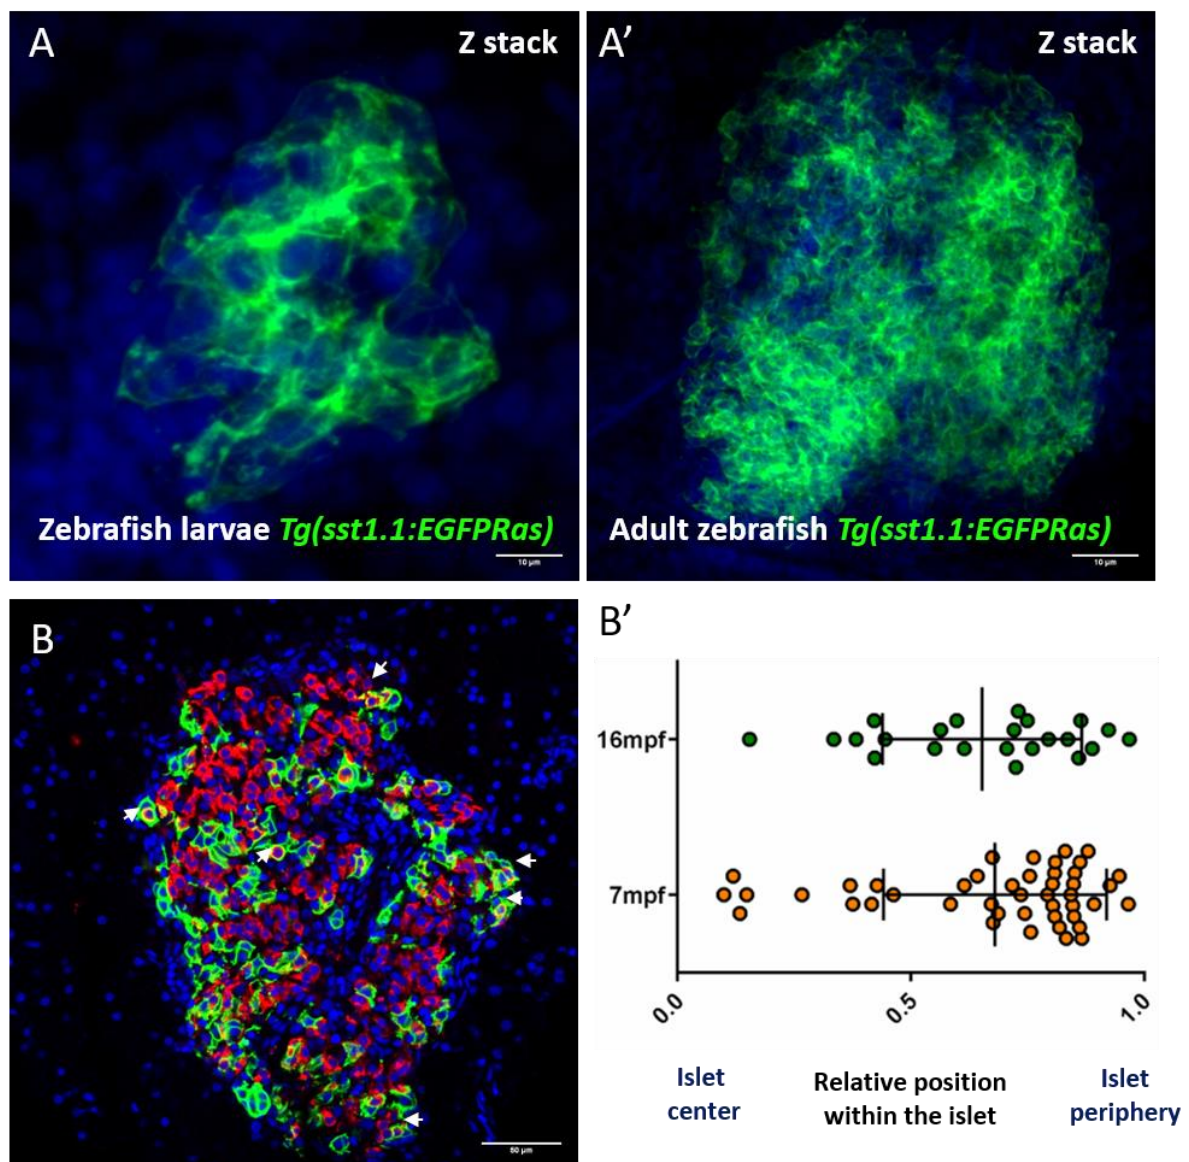

**Fig. S3. The distribution of  $\delta 1$ - and  $\beta/\delta 1$  bi-hormonal cells in the zebrafish islet.** (A-A') Z-projection of the pancreatic islet from 5 dpf zebrafish larvae and adult zebrafish showing the distribution of  $\delta 1$ -cells (EGFP labelled) (DAPI in blue). (B) Single-plane confocal image of the sections from adult zebrafish islets highlighting  $\delta 1$ -cells (green) and  $\beta$ -cells (red). White arrowheads point to the bi-hormonal cells (B'). Scatterplot representing the relative distribution of bi-hormonal cells in the adult zebrafish islet (ay 7 and 16 mpf) (each dot represents a single-cell).

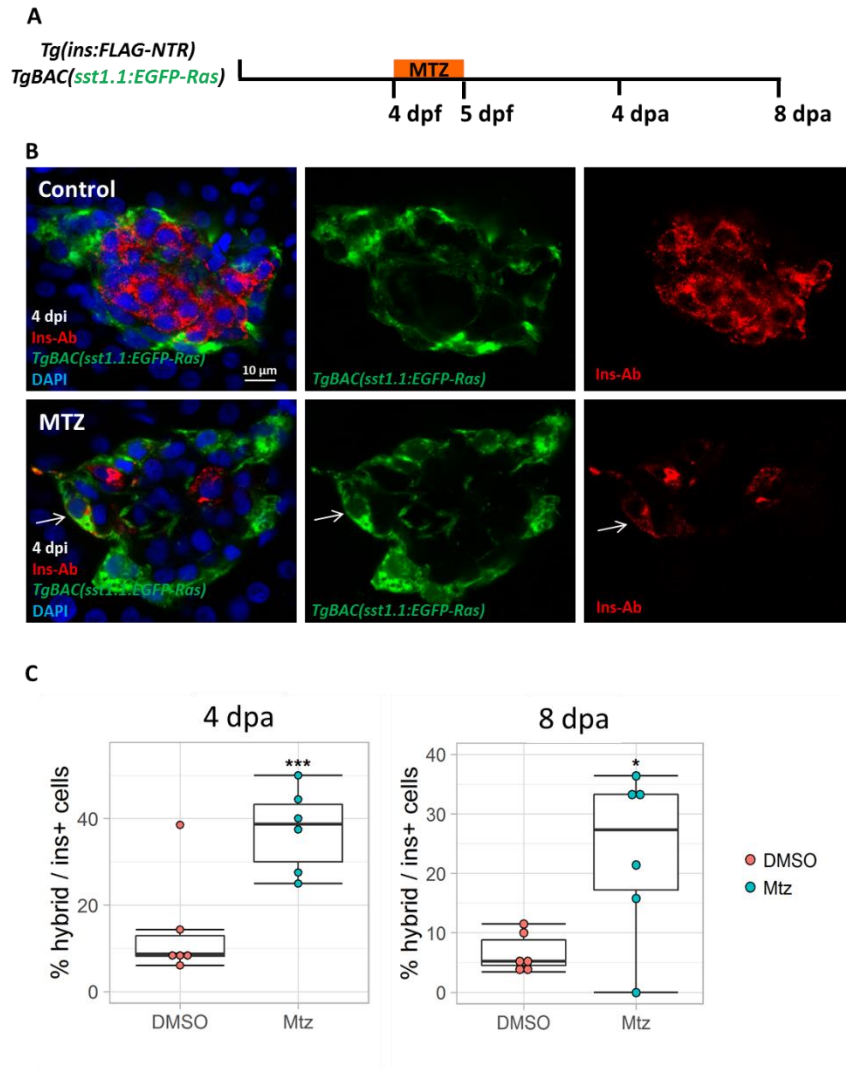

**Fig. S4. The proportion of hybrid cells increase during  $\beta$ -cell regeneration. (A)**

To assess the dynamics of hybrid cells during  $\beta$ -cell regeneration, *Tg(ins: FLAG-NTR)*; *Tg(sst1.1: EGFP-Ras)* double transgenic animals were treated with Mtz at 4 dpf for 24 hours. Following Mtz-based ablation of NTR-expressing  $\beta$ -cells, the samples were collected at 4- and 8-days post-ablation (dpa) for quantification. **(B)** Single confocal stack of islets at 4 dpa. Arrows mark bi-homonal cells, which express EGFP and are also marked with the Insulin antibody. **(C)** Barplots displaying the percentage of bi-homonal cells among all insulin+ cells in the islet at 4 and 8 dpa (n = 6 animals for each condition). Comparison based on two-tailed Heteroscedastic t-test. p-value: \* < 0.05; \*\*\* < 0.001.

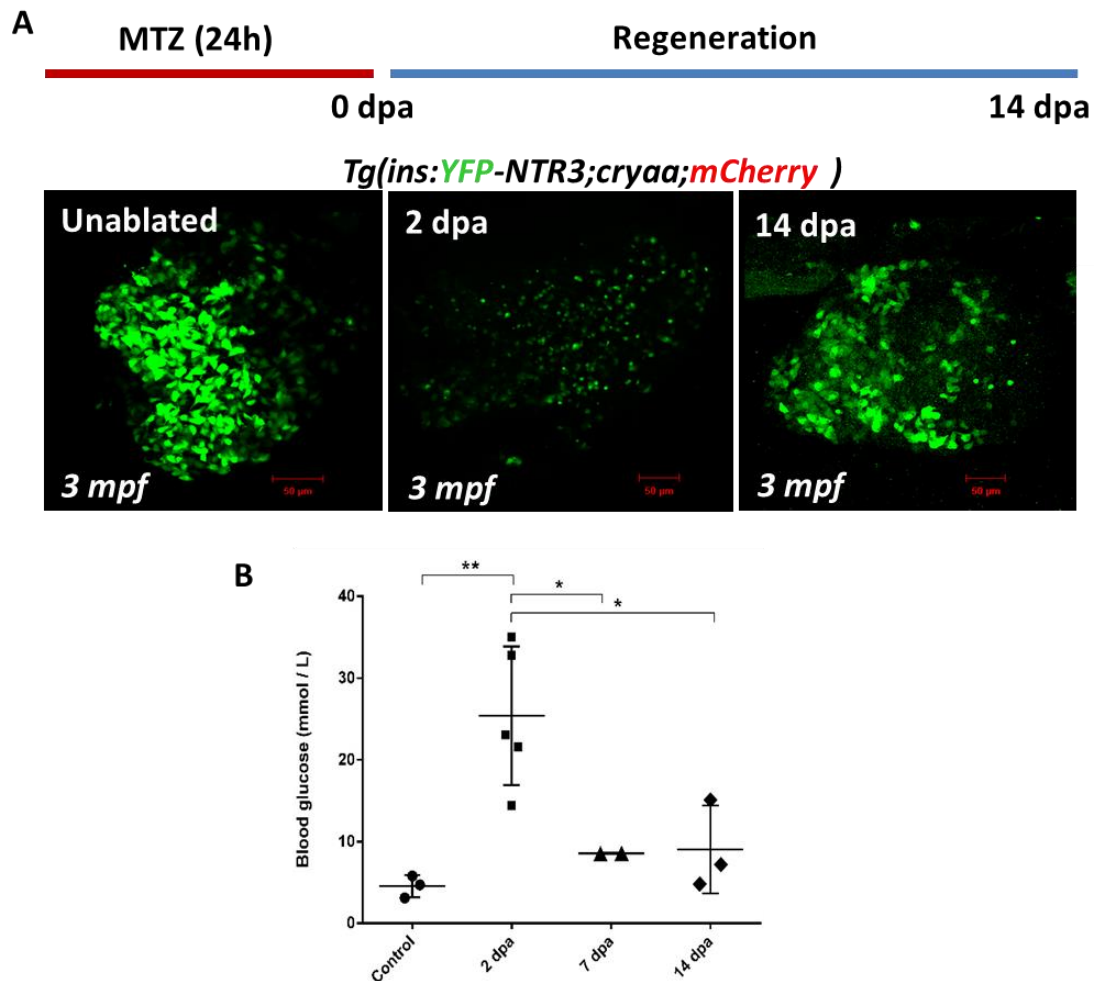

**Fig. S5. An efficient NTR system highlighting  $\beta$ -cell ablation**

**and regeneration in the adult zebrafish pancreas. (A)** Confocal projection of a pancreatic islet from a 3-month-old *Tg(ins:YFP-NTR3)* transgenic zebrafish showing  $\beta$ -cell destruction and regeneration following Mtz-treatment and wash-out. **(B)**

Fasting blood glucose level measurements (mmol/L) show a return to normoglycemic levels by 14-days post  $\beta$ -cell ablation.

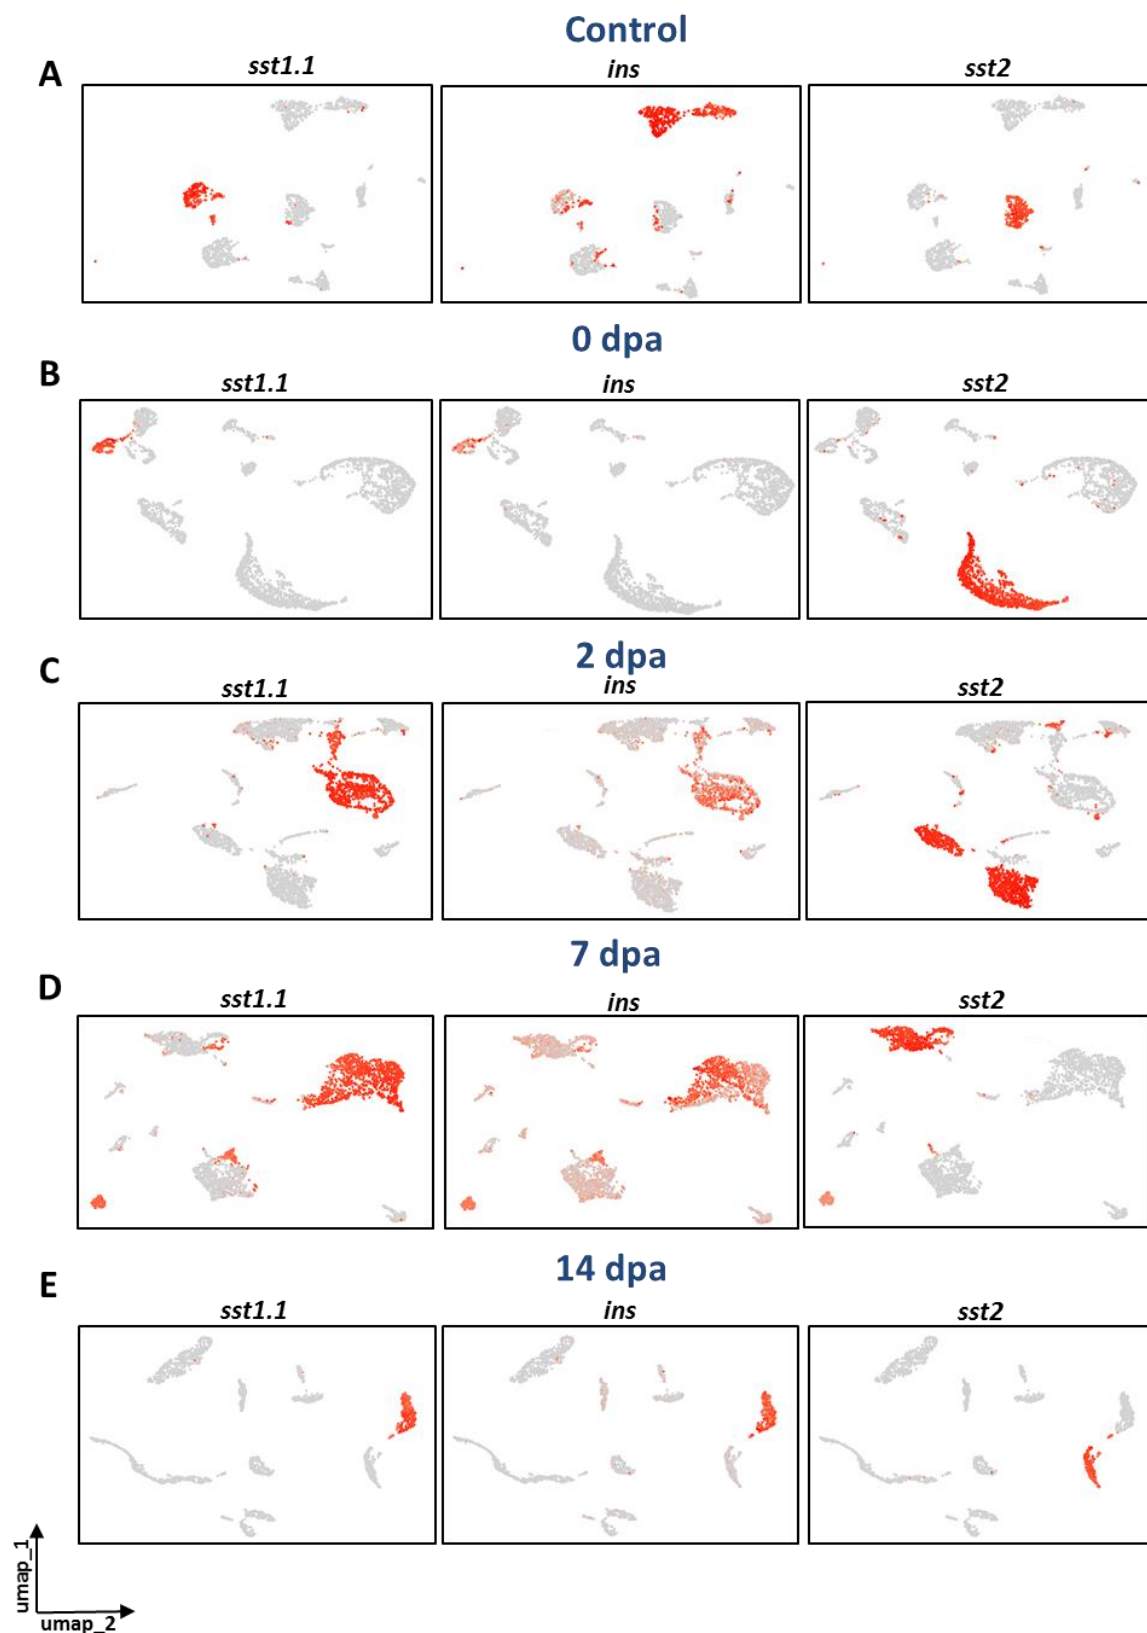

**Fig. S6.  $\delta 1$ - but not  $\delta 2$ -cells express insulin upon  $\beta$ -cell loss in adults. (A-E)**

UMAP plot representation of adult zebrafish pancreatic cells showing expression of *ins*, *sst1.1*, and *sst2* at various  $\beta$ -cell regeneration time-points: Control, 0 dpa, 2 dpa, 7 dpa, and 14 dpa.

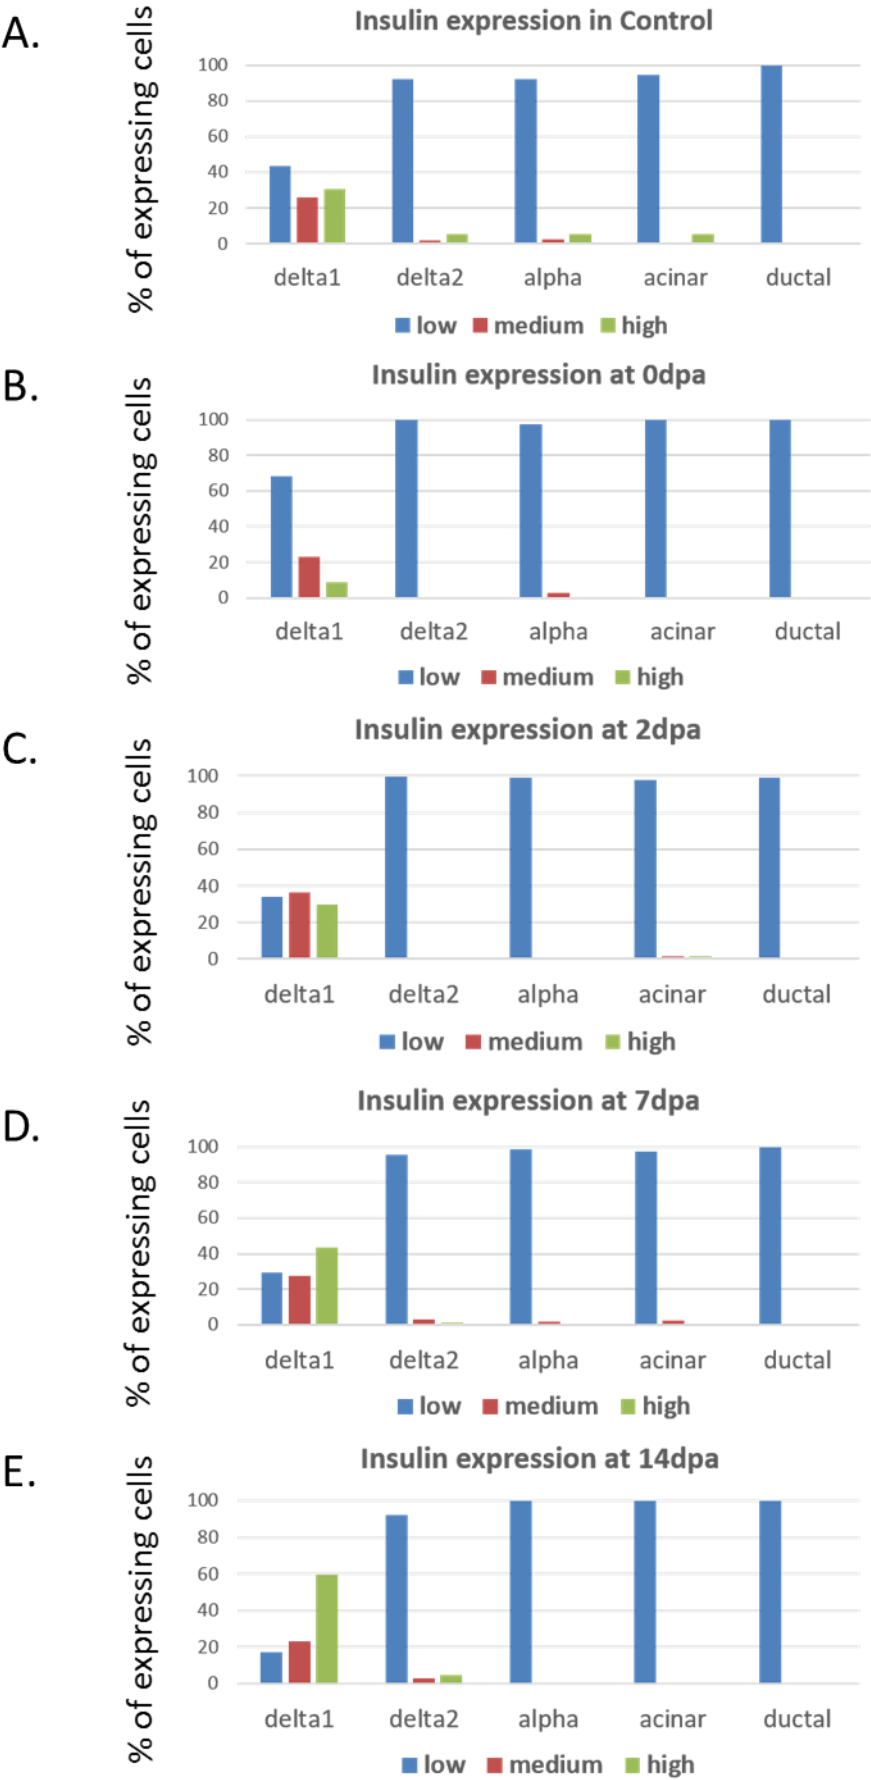

**Fig. S7. Time-course of insulin expression in different cell types during  $\beta$ -cell regeneration. (A-E)** The 10X regeneration datasets were mined to evaluate the proportions of ins-positive cells in the cell clusters expressing  $\delta 1$ ,  $\delta 2$ ,  $\alpha$ , acinar and ductal markers. Based on the insulin expression level, cells were categorized into low, medium and high ins-expressing cells. The bar-plots highlighting *ins* expression profile across different  $\beta$ -cell regeneration time-points and cell types (control, 0, 2, 7 and 14 dpa respectively). Insulin expression increases (from low to high) in  $\delta 1$ -cells during  $\beta$ -cell regeneration, whereas other cell types retain low ins expression across time.

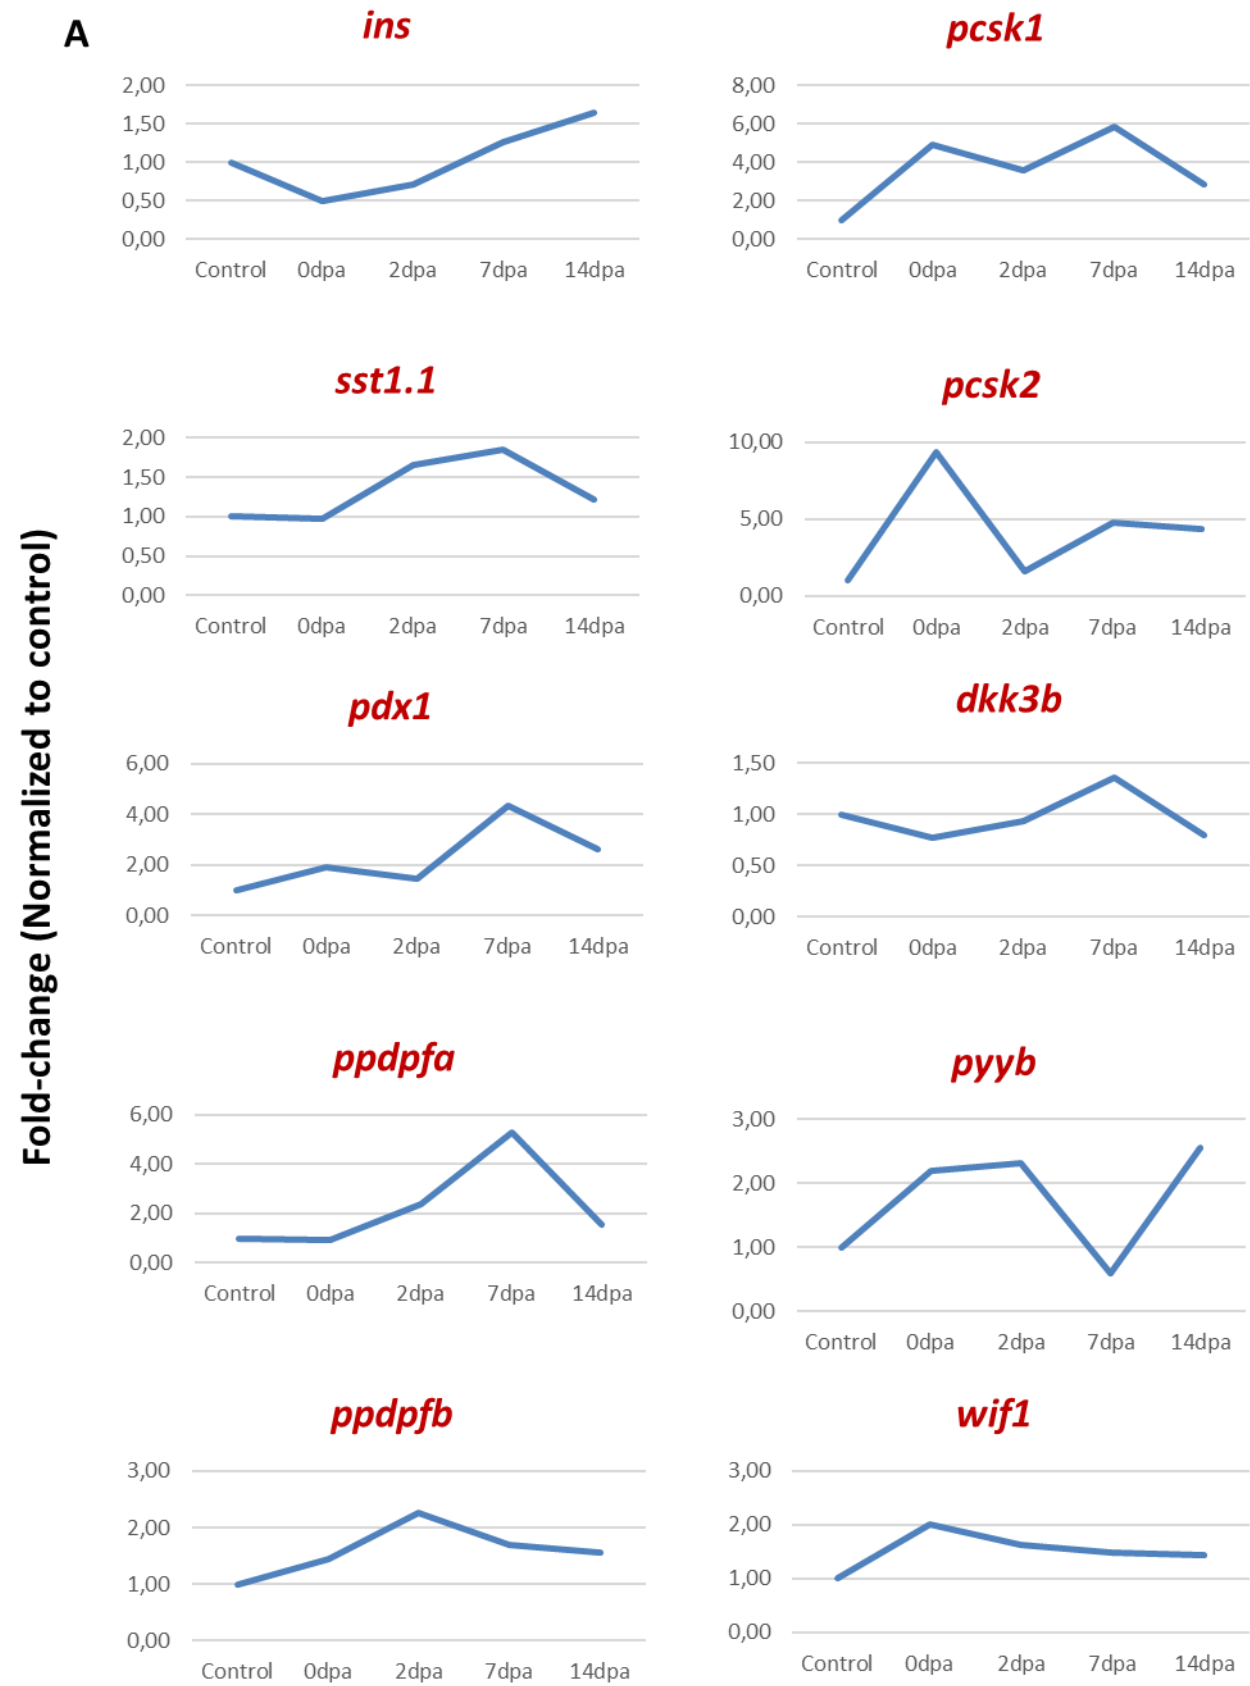

**Fig. S8. Average expression profile of genes in the  $\delta 1$ -cluster**

**during  $\beta$ -cell regeneration. (A)** The 10X regeneration dataset was mined to determine the average expression profile of various  $\beta$ -cell specific genes and progenitor markers in the  $\delta 1$ -cluster. The graph shows the change in the average expression of specific genes (*ins*, *sst1.1*, *pdx1*, *ppdpfa*, *ppdpfb*, *pcsk1*, *pcsk2*, *dkk3b*, *pyyb*, and *wif1*) during  $\beta$ -cell regeneration. The fold-change values on the Y-Axis have been normalized to the average expression profile of the control sample.

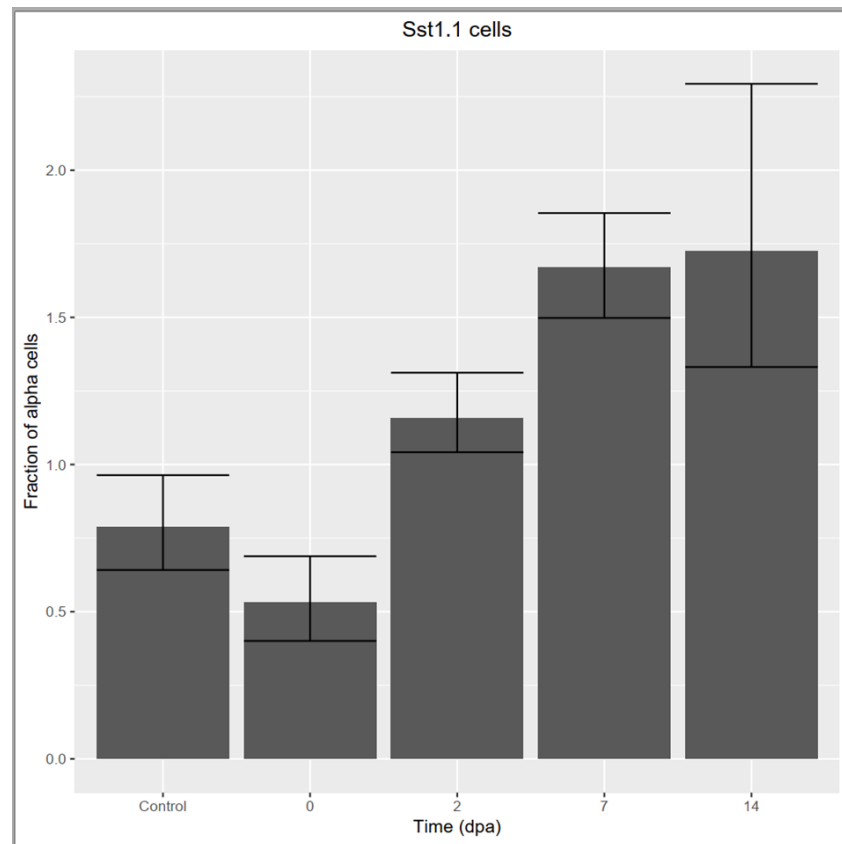

**Fig. S9. The  $\delta 1$ -cell population expands following  $\beta$ -cell ablation.**

Graph showing the increase of *sst1.1*-expressing cells relative to  $\alpha$ -cells after  $\beta$  cell ablation with 99% confidence intervals.

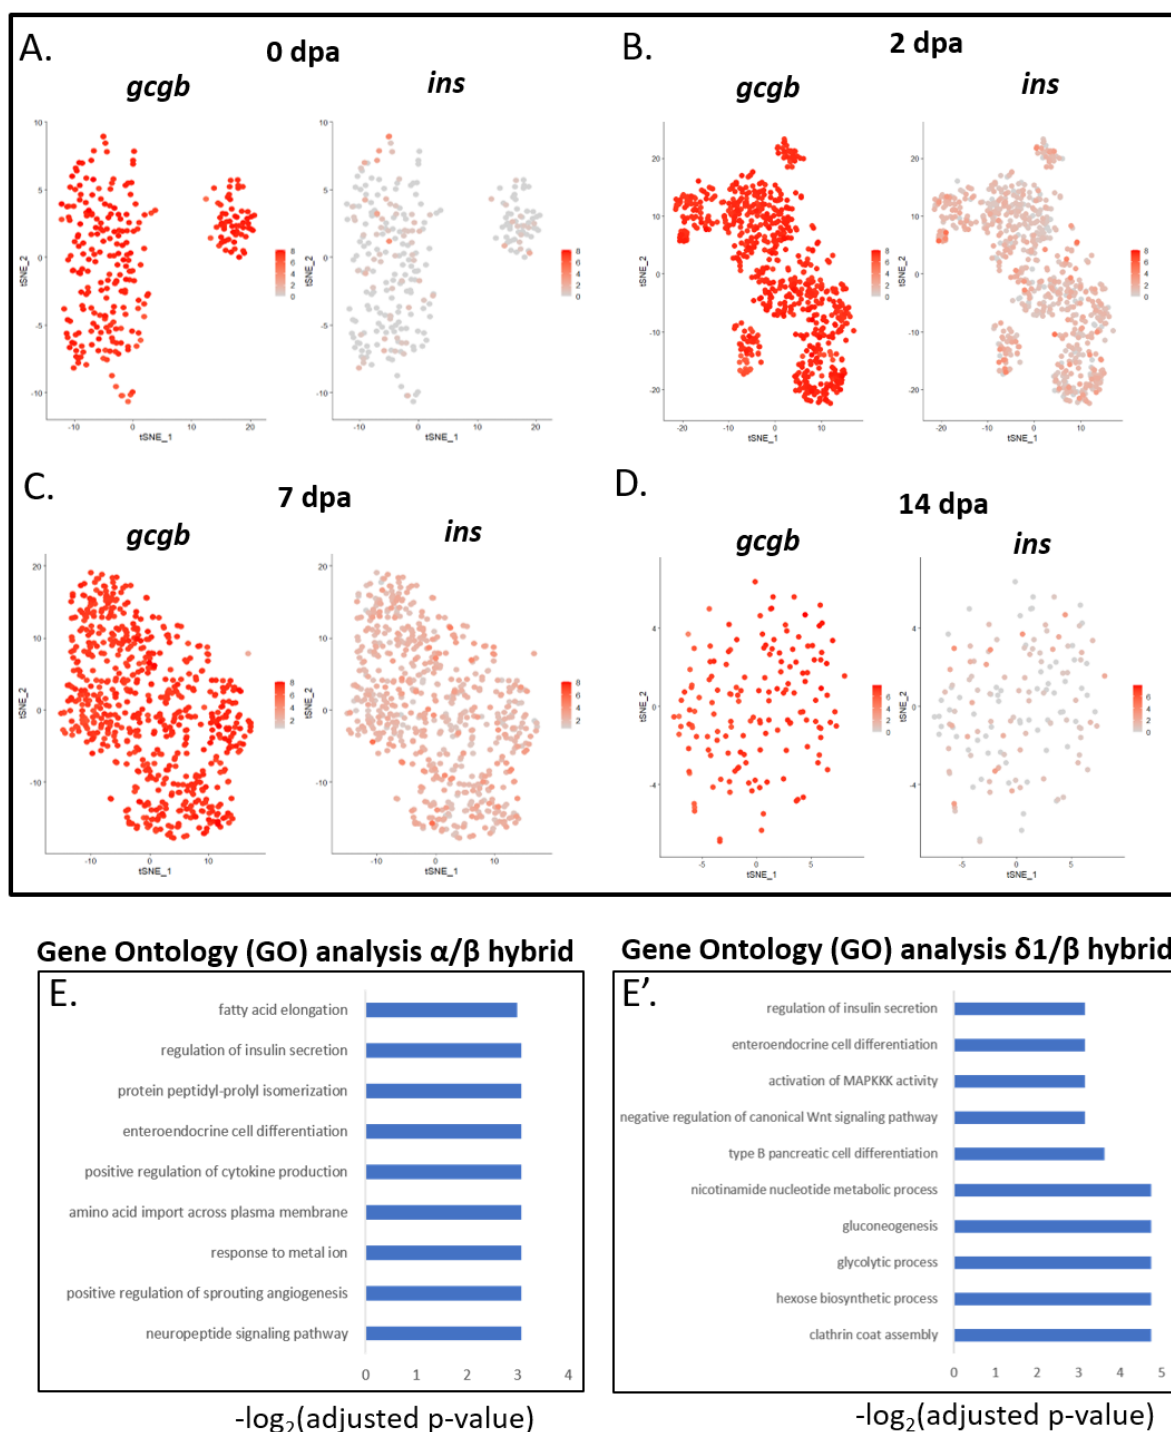

**Fig. S10. Insulin expression in  $\alpha$ -cells over the course of  $\beta$ -cell regeneration**

**(A-D).** t-SNE plot representation of *gcgb* and *ins* expression in the cluster corresponding to  $\alpha$ -cells across various  $\beta$ -cell regeneration time-points. **(E-E')** Gene Ontology (GO) analysis using the DEGs from  $\alpha/\beta$  (E) and  $\delta 1/\beta$  (E') hybrid cells at 7 dpa. GO analysis was performed using the FishEnrichr tool (p-value < 0.05; adjusted p-value (FDR) < 0.15). Highly expressed genes (*ins*, *gcgb* and *sst1.1*) were removed while performing the GO analysis.

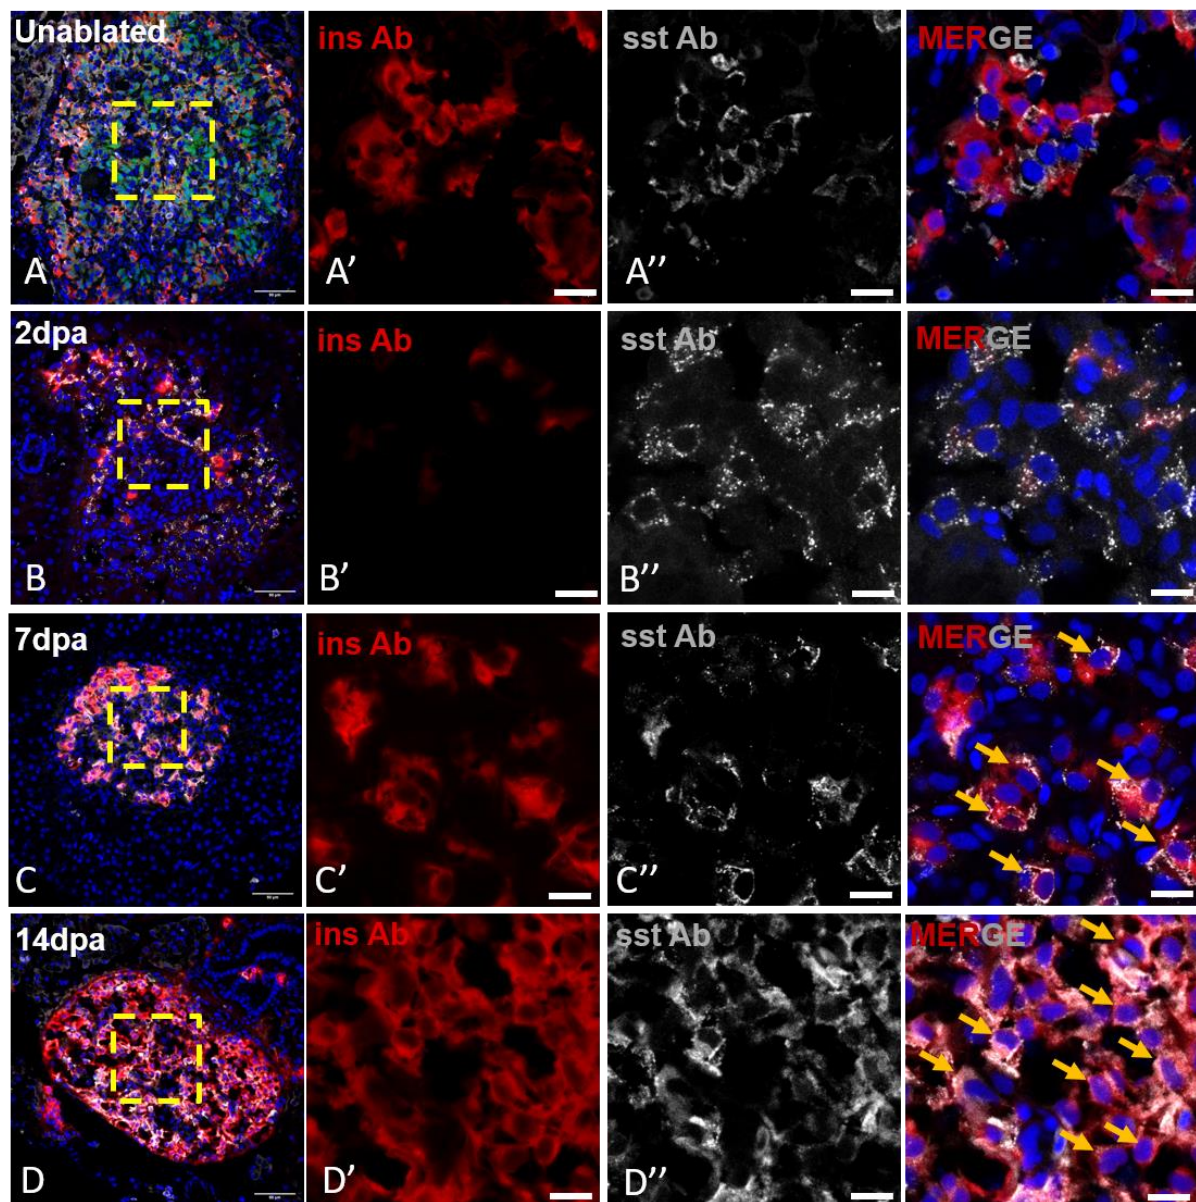

**Fig. S11. Insulin and somatostatin co-expressing cells in the primary islets during the course of  $\beta$ -cell regeneration.** (A-D) Single-plane confocal images of the primary islet from adult zebrafish pancreas over the course of  $\beta$ -cell regeneration: unablated (A), 2 dpa (B), 7 dpa (C) and 14 dpa (D). (Red: insulin antibody; Gray: somatostatin antibody). Yellow arrows point to ins/sst bi-hormonal cells. Scale bars = 50 $\mu$ m (lower magnification); Scale bars = 10 $\mu$ m (higher magnification) images.

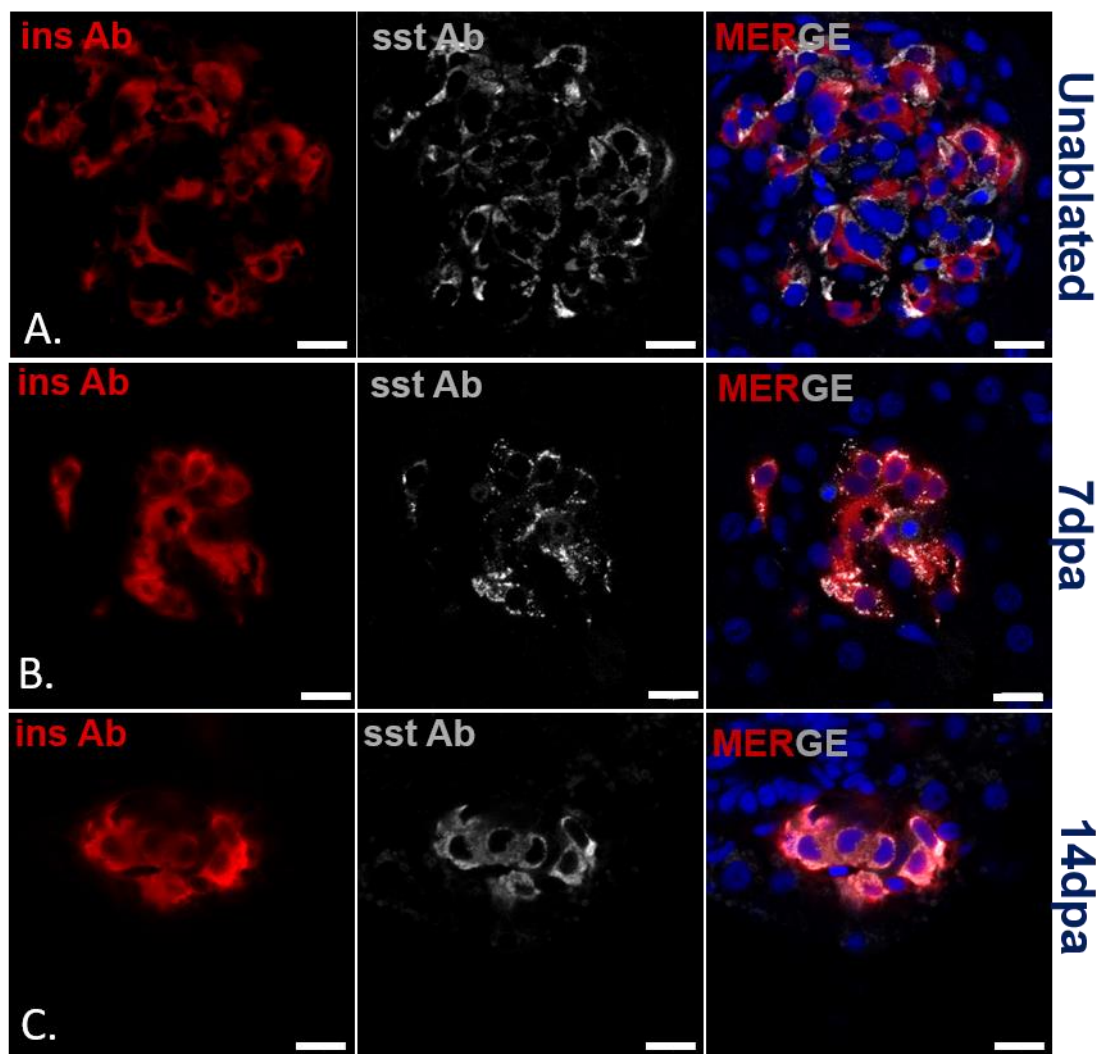

**Fig. S12. Insulin and somatostatin co-expressing cells in the secondary islets during the course of  $\beta$ -cell regeneration. (A-C)** Single-plane confocal images of secondary islets from adult zebrafish pancreas over the course of  $\beta$ -cell regeneration: unablated (A), 7 dpa (B), and 14 dpa (C). (Red = insulin antibody; grey = somatostatin antibody). Scale bars = 10 $\mu$ m.

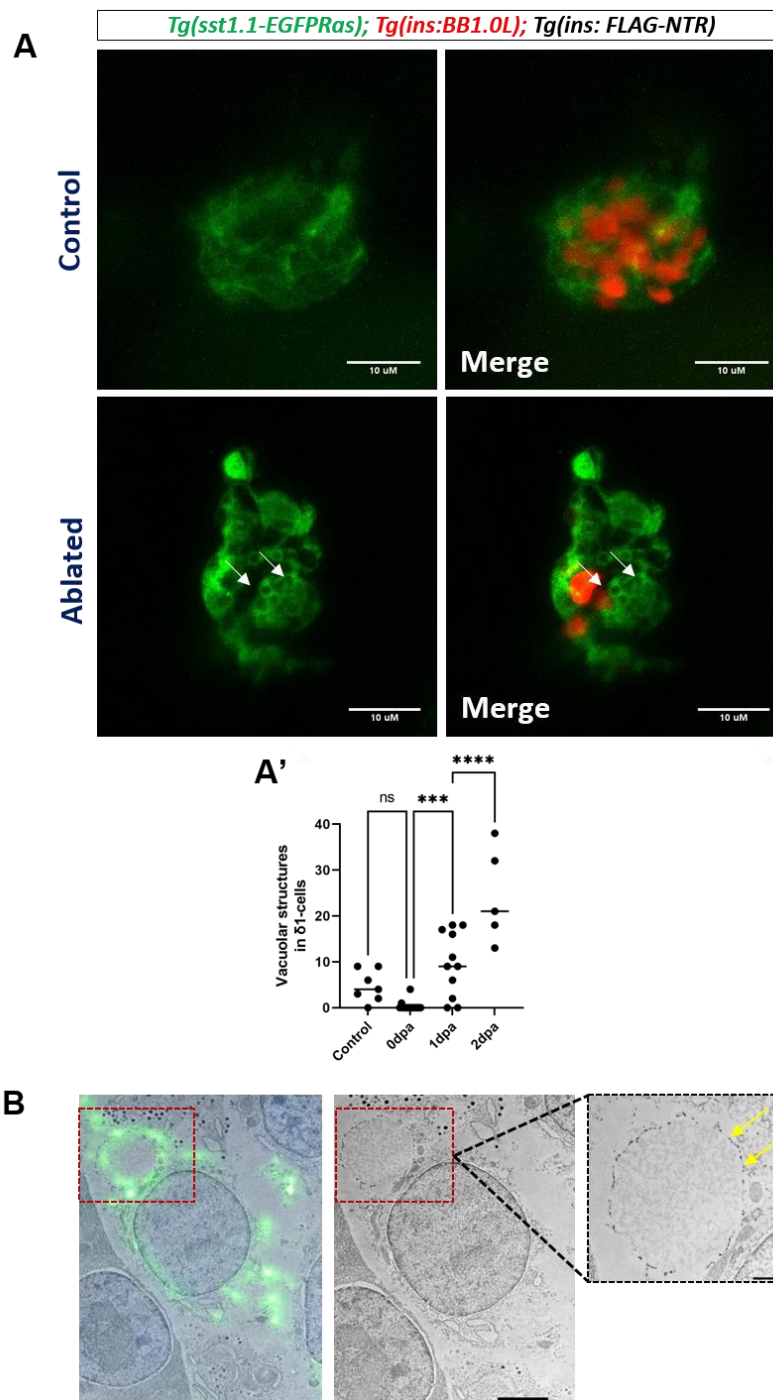

**Fig. S13. Accumulation of vacuolar structures in the  $\delta 1$ -cells**

**upon  $\beta$ -cell loss.** (A) 3D-confocal projection of control and  $\beta$ -cell-ablated samples in *Tg(ins: FLAG-NTR); Tg(sst1.1: EGFP-Ras), Tg(ins: BB1.0L)*-triple transgenic animals. Upon  $\beta$ -cell ablation, there is emergence of prominent vacuolar structures

in the GFP-positive cells. **(A')** Scatter-plot showing the total number of vacuolar structures in the  $\delta$ 1-cells post  $\beta$ -cell loss in the zebrafish larvae. **(B)** CLEM (Correlative Light and Electron Microscopy) section obtained from the pancreatic islet larvae following  $\beta$ -cell ablation. The animals are *Tg(ins: FLAG-NTR); Tg(sst1.1:EGFP-Ras), Tg(ins:BB1.0L)*-triple transgenic. The animals were treated with vehicle or Mtz from 2.5 to 3 dpf and were fixed at 5 dpf. During the CLEM protocol, the sections were labelled with immuno-gold particles labelling the GFP protein (indicated by the yellow arrow). The section highlights the appearance of vacuolar structures (highlighted with the red-box) in  $\delta$ 1-cells at 2-days post  $\beta$ -cell ablation.

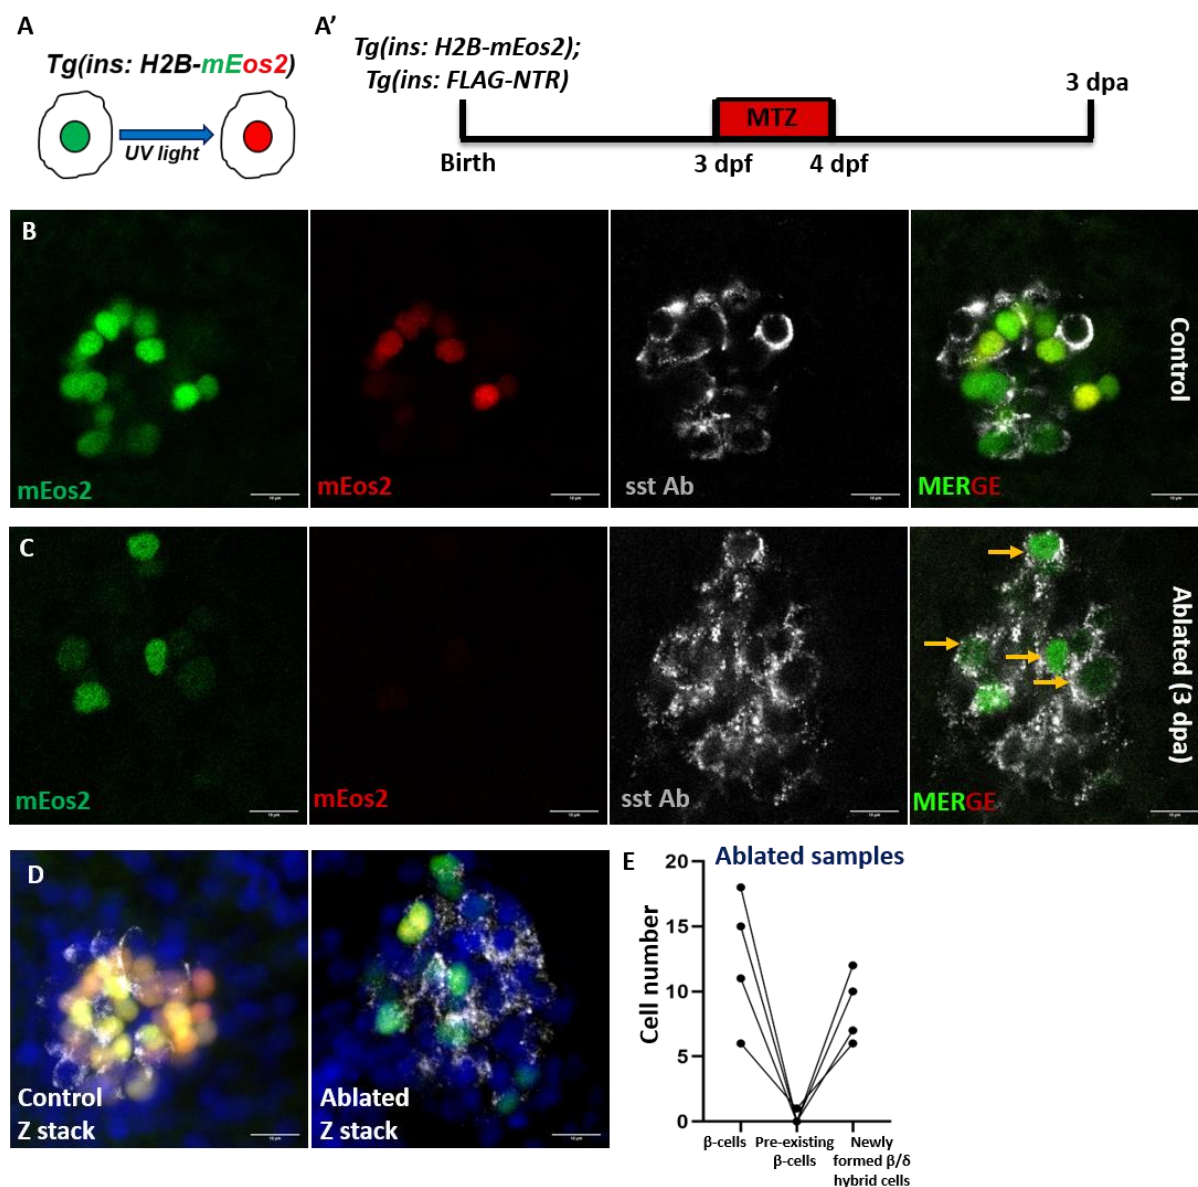

**Fig. S14. Bi-hormonal cells do not arise from pre-existing  $\beta$ -**

**cells.** **(A)** Schematic of the *Tg(ins: H2B-mEos2)* reporter line, where a green-to-red photoconvertible protein mEos2 (fused to histone H2B) is expressed under the insulin promoter. The nuclei of pre-existing  $\beta$ -cells are photo labeled in red upon exposure to blue light. **(A')** Schematic of the experimental setup for performing  $\beta$ -cell tracing in zebrafish larvae. Double transgenic *Tg(ins: H2B-mEos2); Tg(ins: FLAG-NTR)* larvae were exposed to blue light at 3 dpf, followed by Mtz treatment. Control larvae were incubated in E3 medium. The samples were evaluated at 3 dpa. **(B-C)** Single-plane confocal images of the larval zebrafish pancreas from control (unablated) and  $\beta$ -cell

ablated samples (3 dpa). Somatostatin immunohistochemistry is shown in grey. Yellow arrowheads in the ablated samples point to newly formed cells that express un-photoconverted mEOS (green) under the *insulin* promoter and somatostatin (grey). **(D)** Z-stack projection of the zebrafish islets from control and ablated samples. Nuclei are shown in blue (DAPI). **(E)** Dot-plot showing the regeneration of  $\beta$ -cells in the zebrafish larvae at 3 dpa ( $\beta$ -cells = total number of  $\beta$ -cells at 3 dpa; pre-existing  $\beta$ -cells = number of  $\beta$ -cells with the red nuclear label; newly formed  $\beta/\delta$  hybrid cells = number of  $\beta$ -cells with green nuclear label and somatostatin expression). The lines connect the data points from each individual sample. Scale bars = 10  $\mu$ m.

**Table S1.** List of marker genes used for annotating the clusters from 2 mpf zebrafish dataset.

[Click here to download Table S1](#)

**Table S2.** List of differentially expressed genes (DEGs) for  $\delta 1$ - and  $\delta 2$ -cells from 2 mpf zebrafish dataset.

[Click here to download Table S2](#)

**Table S3.** List of marker genes used for annotating the clusters in the  $\beta$ -cell regeneration integrated dataset.

[Click here to download Table S3](#)

**Table S4.** List of DEGs for  $\alpha/\beta$  and  $\delta 1/\beta$  hybrid cells from 7 dpa. The genes were used for performing GO analysis.

[Click here to download Table S4](#)

**Table S5.** List of co-expressed genes for zebrafish  $\delta 1$  and  $\delta 2$  cells on comparison with human  $\delta$  and  $\gamma$  cells.

[Click here to download Table S5](#)

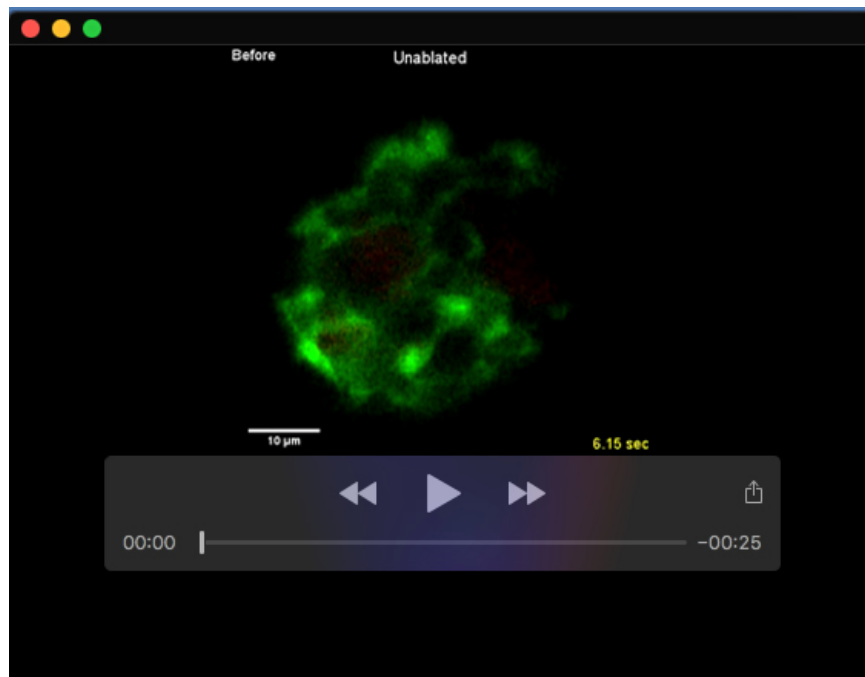

**Movie 1.** *In vivo* live imaging of glucose stimulated calcium influx in the pancreas of zebrafish larvae (control larvae);  $\beta$ -cells (red),  $\delta$ 1-cells (green)

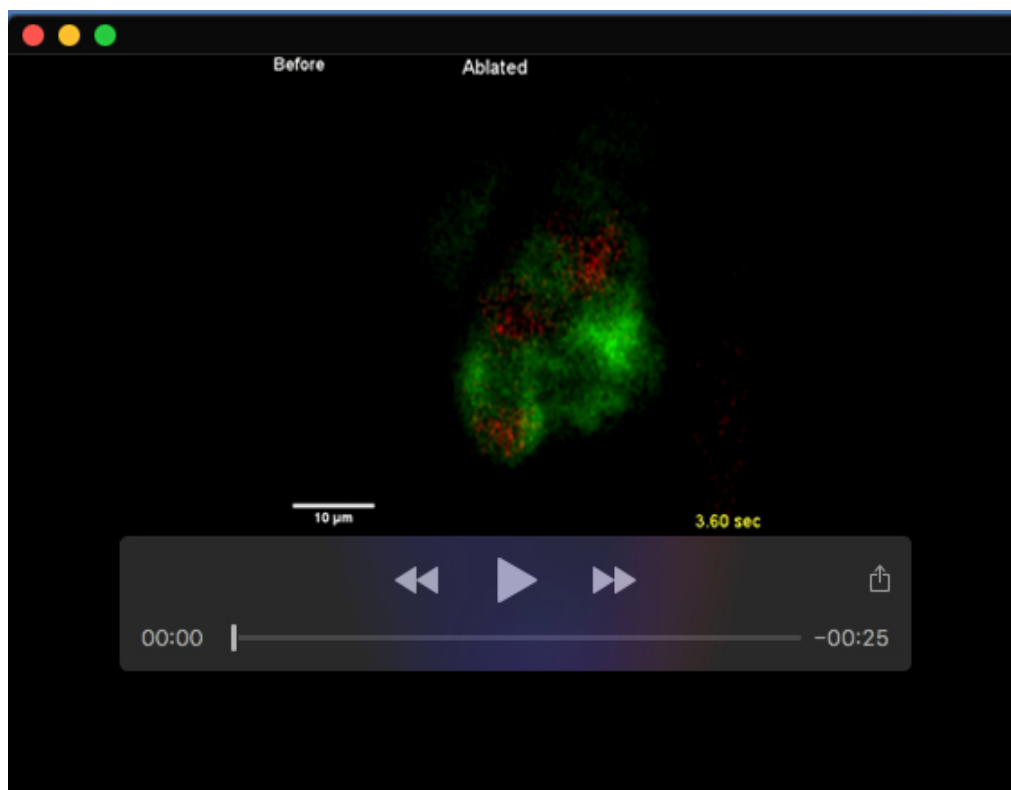

**Movie 2.** *In vivo* live imaging of glucose stimulated calcium influx in the pancreas of zebrafish larvae at 4 days post  $\beta$ -cell ablation;  $\beta$ -cells (red),  $\delta$ 1-cells (green)
